# Supplementary material
Source: Springer Nature journal article supplement (https://www.springermedizin.de/resource/supplementary/12936_2013_3218_MOESM3_ESM.pdf/9545352)

Percent

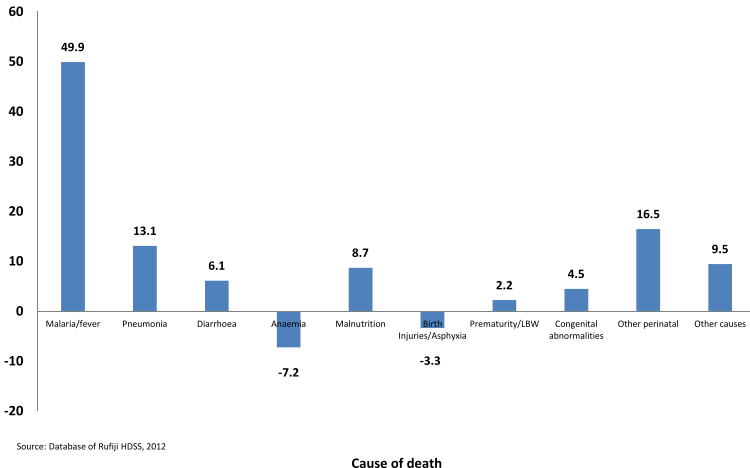

Source: Database of Rufiji HDSS, 2012

Supplement: MOESM3 [file 9545352]
